# Supplementary material for: The Transcriptomic Mechanism of a Novel Autolysis Induced by a Recombinant Antibacterial Peptide from Chicken Expressed in Pichia pastoris
Source: MDPI journal article supplement (doi:10.3390/molecules27062029), 2022-03-21
Supplement: s1 [file s1]

**Table S1 Quality control of data after processing.**

| sample | raw_reads | clean_reads | clean_bases | Q20   | Q30   | GC content |
|--------|-----------|-------------|-------------|-------|-------|------------|
| AFX_1  | 42818082  | 41966864    | 6.3G        | 97.75 | 93.14 | 44.25      |
| AFX_2  | 45678016  | 44611564    | 6.69G       | 97.81 | 93.36 | 44.2       |
| AFX_3  | 44832542  | 43708314    | 6.56G       | 97.75 | 93.13 | 44.16      |
| AP_1   | 44408450  | 43376640    | 6.51G       | 97.58 | 92.81 | 44.16      |
| AP_2   | 45861312  | 45063184    | 6.76G       | 97.88 | 93.46 | 44.13      |
| AP_3   | 43510568  | 42433742    | 6.37G       | 97.41 | 92.39 | 43.89      |

**Table S2 The total reads and map percentages of data.**

| sample | total_reads | total_map        |
|--------|-------------|------------------|
| AFX_1  | 41966864    | 39455808(94.02%) |
| AFX_2  | 44611564    | 41852040(93.81%) |
| AFX_3  | 43708314    | 41072327(93.97%) |
| AP_1   | 43376640    | 41667068(96.06%) |
| AP_2   | 45063184    | 43374096(96.25%) |
| AP_3   | 42433742    | 40861704(96.3%)  |

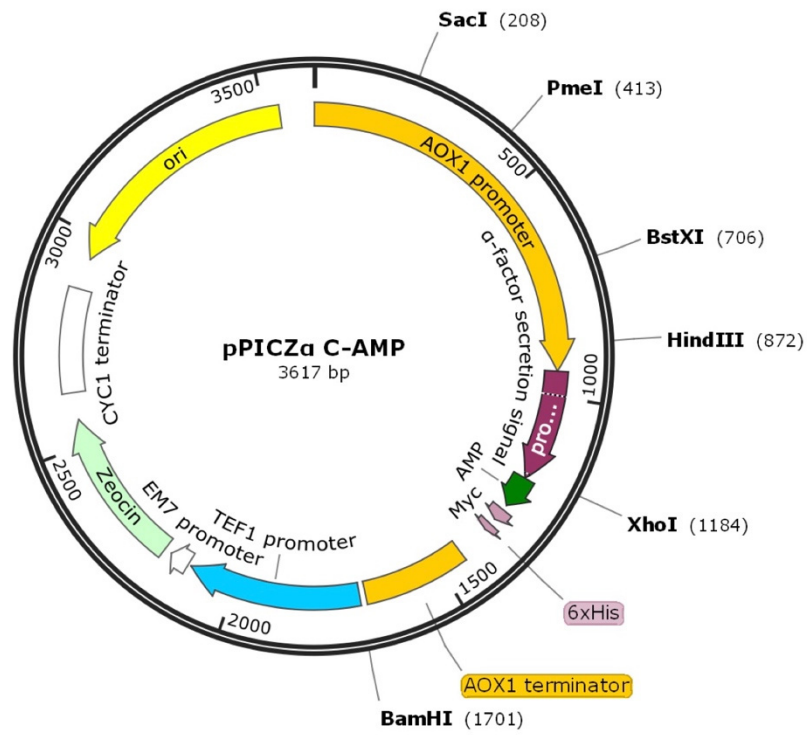

**Figure S1 The diagram of the plasmid pPICZα C-AMP.**

**The codon-optimized AMP gene sequence for *P. pastoris***

ATGCTATCTTGTTGGGTCTGTTGCTAGCATTGTTAGGCGGAGCCTGTGCCCTGCCTGC  
TCCATTGGGTACTCTCAAGCTTTGGCACAAGCCGTCGATAGTTACAACCAACGACCC  
GAGGTTCAAAACGCTTTCAGATTGTTATCCGCTGACCCTGAGCCAGGACCTAATGTGC  
AATTGAGTTCTCTGCATAACTTGAACCTTACCATAATGGAGACAAGATGTCAAGCCAGA  
TCAGGTGCCCAGTTGGATTCCTGTGAGTTCAAAGAAGATGGATTAGTGAAAGATTGTG  
CAGCACCAGTTGTTTTACAAGGTGGTCGTGCTGTCTTAGACGTAACTGTGTTGATTCA  
ATGGCCGACCCTGTTTCGTGTAAACGTGTTTGGCCTTTGGTGATCCGTACCGTTATCGC  
TGGTTACAACCTGTACAGAGCTATTAAAAAGAAATGA
